# Supplementary material
Source: PubMed Central journal article supplement (PMC10292091)
Supplement: NIHMS1514382-supplement-2.pdf [file NIHMS1514382-supplement-2.pdf]

## SUPPLEMENTARY FIGURES

**Supplementary figure 1. VOGM type and representative imaging for probands, Related to Table 2**

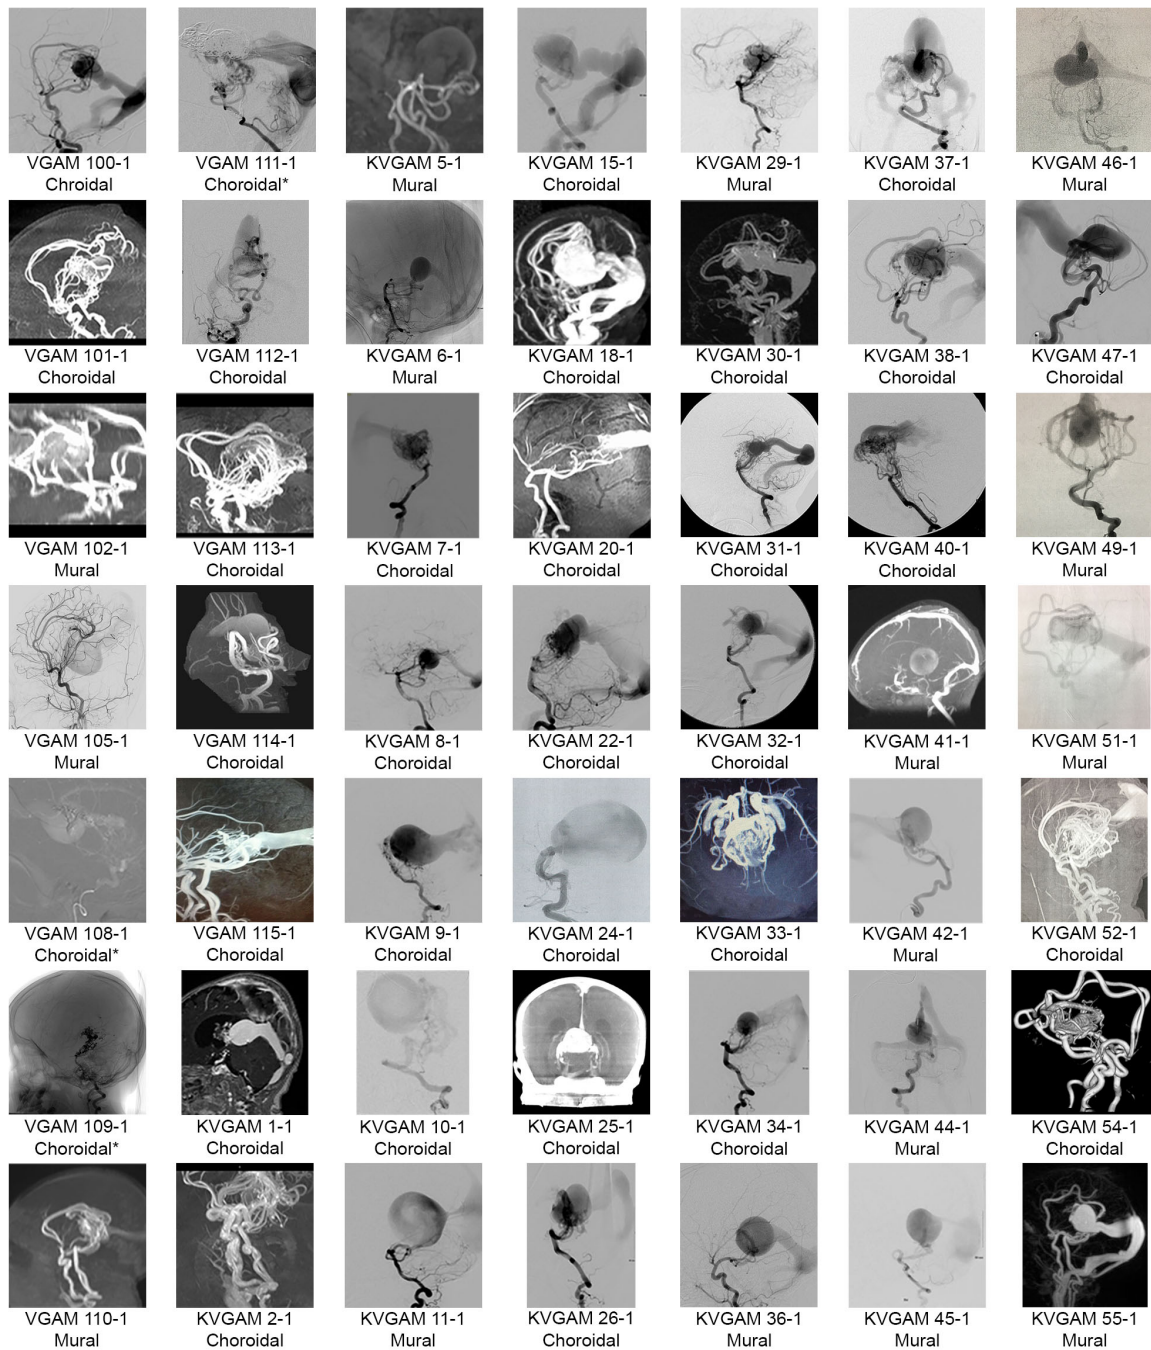

\* = Post Embolization

Per Detailed Angiogram Report: VGAM 104-1: Choroidal; VGAM 107-1: Choroidal; KVGAM 3-1: Mural; KVGAM 4-1: Choroidal; KVGAM 35-1: Choroidal; KVGAM 43-1: Mural.

Representative images of 3-Tesla time-of-flight magnetic resonance angiography or digital subtraction angiography for all patients with available imaging, with patient codes and VOGM subtype. In cases for which imaging was not available, VOGM subtype was ascertained from detailed transcripts of angiographies during or before endovascular treatment of VOGM.

**Supplementary figure 2. Chromatogram alignments and segregation of select candidate variants, Related to Table 2 and Figure 2, 4, and 5**

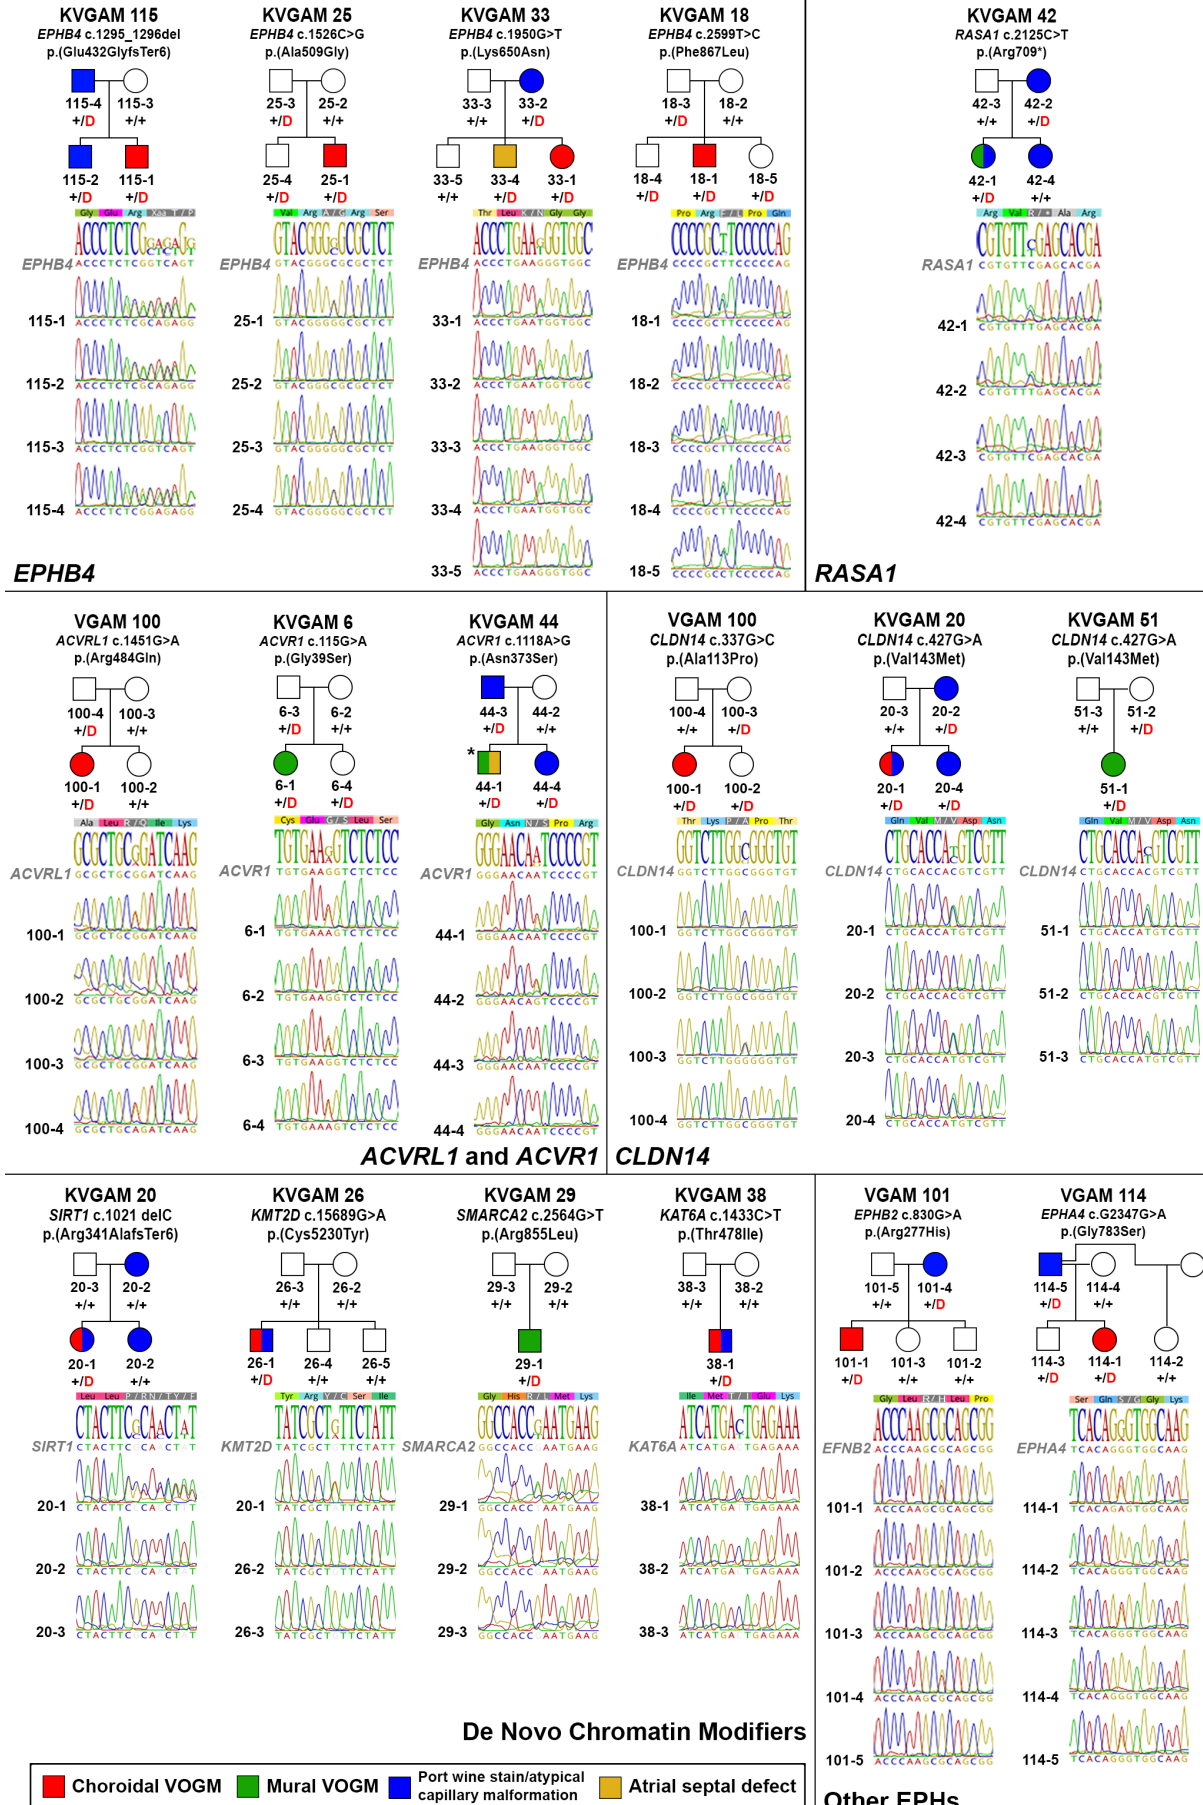

Mutations identified by exome sequencing were confirmed by direct PCR amplification with custom primers followed by Sanger sequencing.



**Supplementary figure 3. Cutaneous manifestations in VOGM probands and family members, Related to Figure 4 and 5**

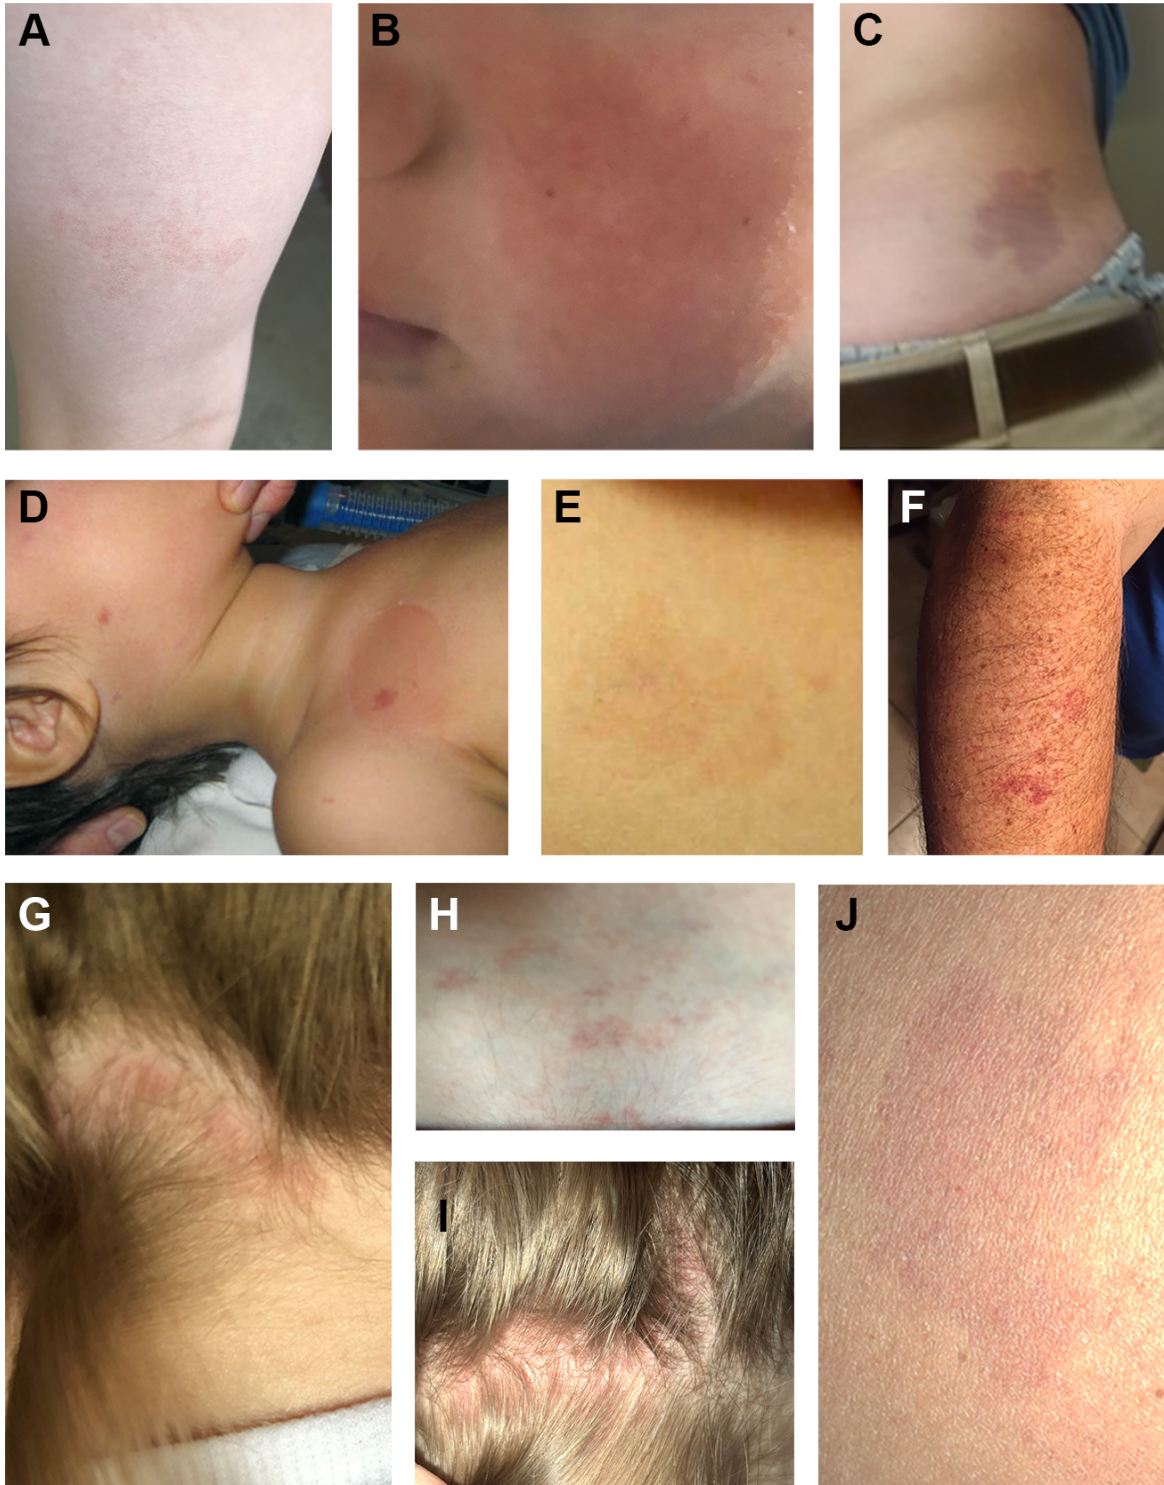

Atypical capillary malformation on the posterolateral aspect of the distal third of the thigh (A) and left cheek (B) of VGAM115-2. Panel C demonstrates an atypical capillary malformation on left flank of VGAM115-4 – both individuals depicted in panels A-C carry *EPHB4* c.1295\_1296del; p.Glu432fs. Atypical capillary malformations on the angle of the jaw and superior right thorax of KVGAM42-1 (D) and KVGAM42-2 (E). Both individuals depicted in panels D-E carry *RASAI* c.2125C>T; p.Arg708\*. (F). Atypical capillary malformation on the posterolateral aspect of the forearm in VGAM114-5, carrier of *EPHA4* c.2347G>A; p.Gly783Ser. (G). Nuccal atypical capillary malformation in a proband harboring *CLDN14* p.(Val143Met) (H). Lumbar atypical capillary malformation in the same proband depicted in panel G. (I). Nuccal atypical capillary malformation in the sister of the proband depicted in panels G and H, also harboring *CLDN14* p.Val143Met. (J). Atypical capillary malformation in the thigh of the mother of individuals depicted in panels G-I, carrying and transmitting *CLDN14* p.Val143Met.

## Supplementary figure 4. *In silico* modeling of *CLDN14* mutations, Related to Figure 5

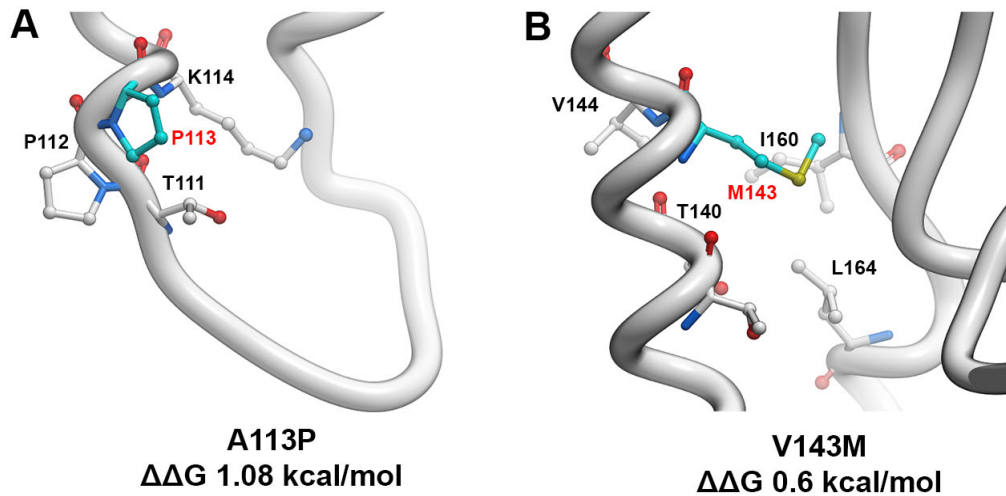

- (A) *In silico* modeling of p.Ala113Pro. Ala113 is the first residue of Helix-3 and lies between P112 and K114 at the interface of Claudin-14 and the cytoplasmic side of the lipid bilayer. Just preceding helix-3 is the loop that connects helix-2 and -3, on which posttranslational modification sites are present, including for palmitoylation. The presence of Proline in an alpha helix can result in helix distortion since it lacks the backbone NH to establish the hydrogen bonding necessary to complete the H-bond chain. Additionally the steric or rotamer effects prevent Proline from adopting helical geometry. The two adjacent Proline residues 112 and 113 likely influence the conformation of the helix 2-3 connector loop and destabilize the initial portion of helix-3. Calculated  $\Delta\Delta G$  of A113P is 1.08 Kcal/mol.
- (B) *In silico* modeling of p.Val143Met located towards the end of helix-3 at the outer leaflet of the lipid bilayer. The Valine side chain is tightly packed against  $\beta$  sheets, being surrounded by the hydrophobic side chains of L164, I160 and V144. The V143M mutation ( $\Delta\Delta G = 0.6$  Kcal/mol) results in steric clash of the larger Methionine side chain with the beta sheets.



**Supplementary figure 5. Mutations affecting other members of the Ephrin family in VOGM patients displaying CM-AVM-like cutaneous manifestations, Related to Figure 3**

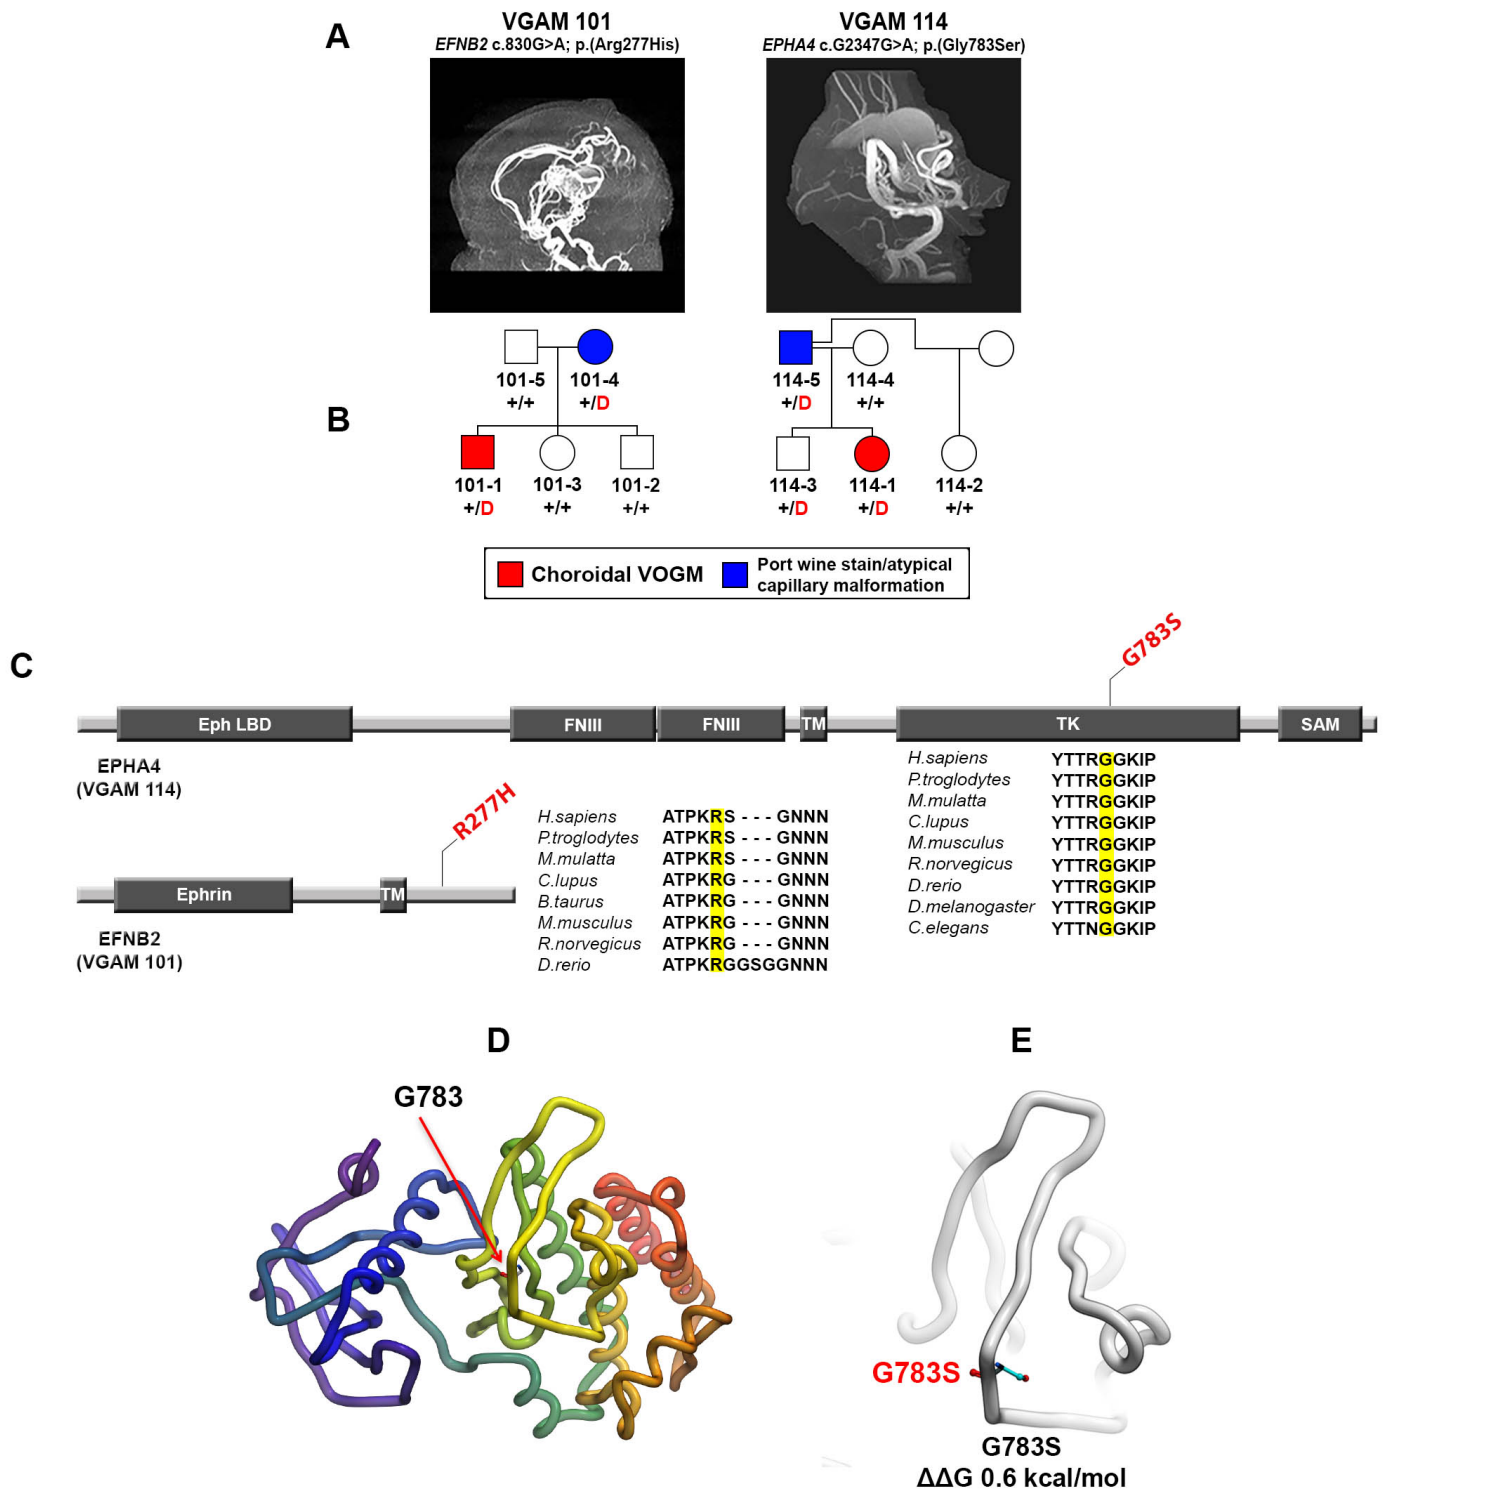

- (A) Representative magnetic resonance angiography and digital subtraction angiography images demonstrating choroidal Vein of Galen malformations in probands.
- (B) Pedigrees depicting kindred structure and phenotypic variance. Note the presence of atypical capillary malformations represented by blue symbols in both parents transmitting *EFNB2* and *EPHA4* mutations in families VGAM101 and VGAM114. Red 'D' denotes damaging mutation, '+' denotes wild type sequence.
- (C) Linear representation of affected Ephrin polypeptides. Functional domains are represented by dark rectangles. Amino acid modifications are mapped on the protein structure in red lettering. Conservation of the wild-type amino acid substituted by the four deleterious missense mutations is depicted on the right of each molecule schematic. LB = ligand binding domain; CRD = Cysteine-rich domain; FNIII = Fibronectin III domain; TM = Transmembrane domain; TK = Tyrosine kinase domain; SAM = Sterile alpha motif.
- (D) *In silico* modelling of the repercussion of Eph-A4 p.Gly783Ser. Gly783 lies at the base of a flexible loop in Eph-A4.
- (E) The Gly-to-Ser substitution at this position ( $\Delta\Delta G$  0.6Kcal/mol) is predicted to affect loop stability.

**Supplementary figure 6. Damaging ACVR1 mutations in mural Vein of Galen malformation, Related to Figure 3**

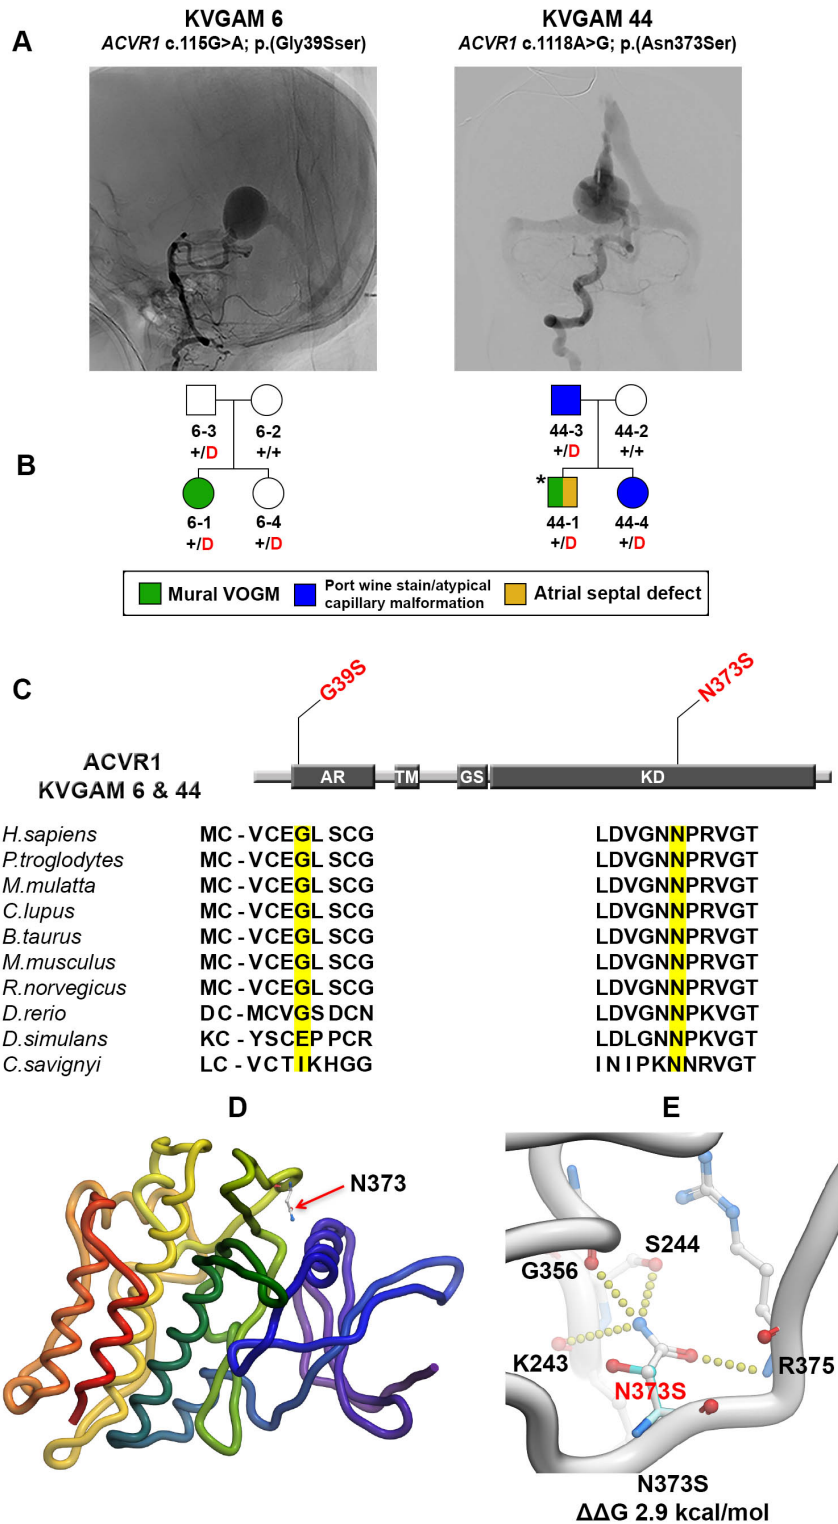

- (A) Representative images from digital subtraction angiographies demonstrating mural Vein of Galen Malformations in probands.
- (B) Pedigrees depicting kindred structure and phenotypic variance. Blue symbols represent atypical capillary malformations in individuals harboring the c.1118A>G; p.Asn373Ser mutation. Yellow coloring of half the symbol denotes concomitant presence of an atrial septal defect and (asterisk) partial anomalous pulmonary venous return in the proband of family KVGAM44. Red 'D' denotes damaging mutation, '+' denotes wild type sequence.
- (C) Linear representation of the ACVR1 polypeptide, with functional domains represented as dark rectangles. Amino acid modifications are mapped (in red) on the protein structure. Conservation of the wild-type amino acid substituted by the two deleterious missense mutations is depicted below each. AR = activin receptor; TM = Transmembrane domain; KD = Kinase domain.
- (D) *In silico* modelling of p.Asn373Ser. Asn373 in a 3D model of ACVR1.
- (E) Predicted energetically costly ( $\Delta\Delta G$  2.9Kcal/mol) loss of hydrogen bond formation between the Asn373 side chain and backbone atoms of Gly356, Lys243, Arg375 and the side chain of Ser244 caused by Asn373 substitution to serine.

## Supplementary figure 7. Interactome of mutated Ephrin receptor signaling genes in VOGM, Related to Table 2 and Figure 3

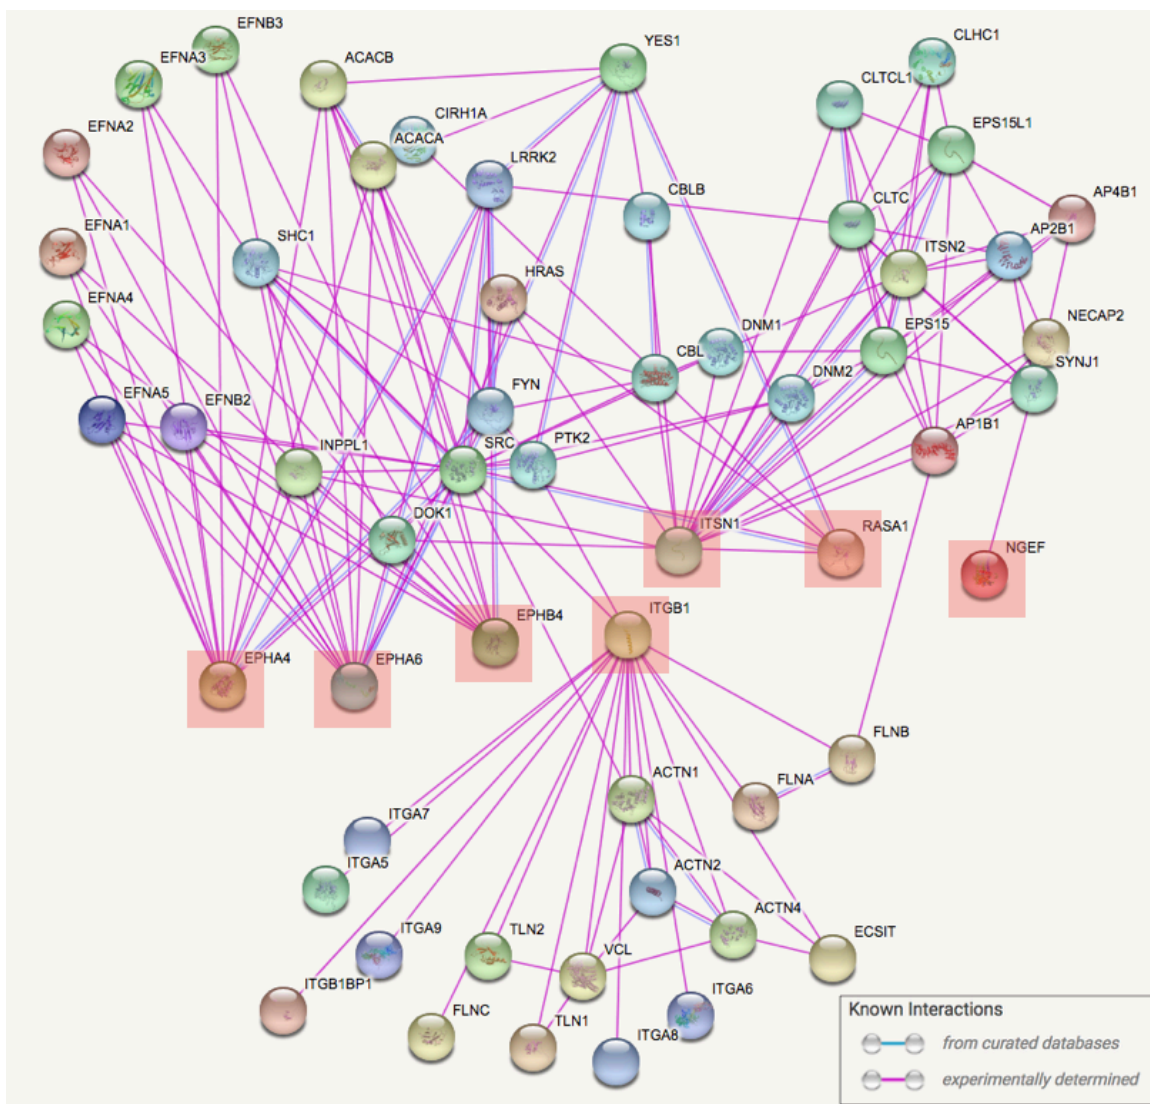

All 7 genes (highlighted) contributing to the significant result of the Ephrin receptor signaling pathway in IPA pathway analysis were input into String. These 7 genes are mapped into a single experimentally supported STRING interactome.



### Supplementary figure 8. The genomic landscape of VOGM, Related to Figure 3

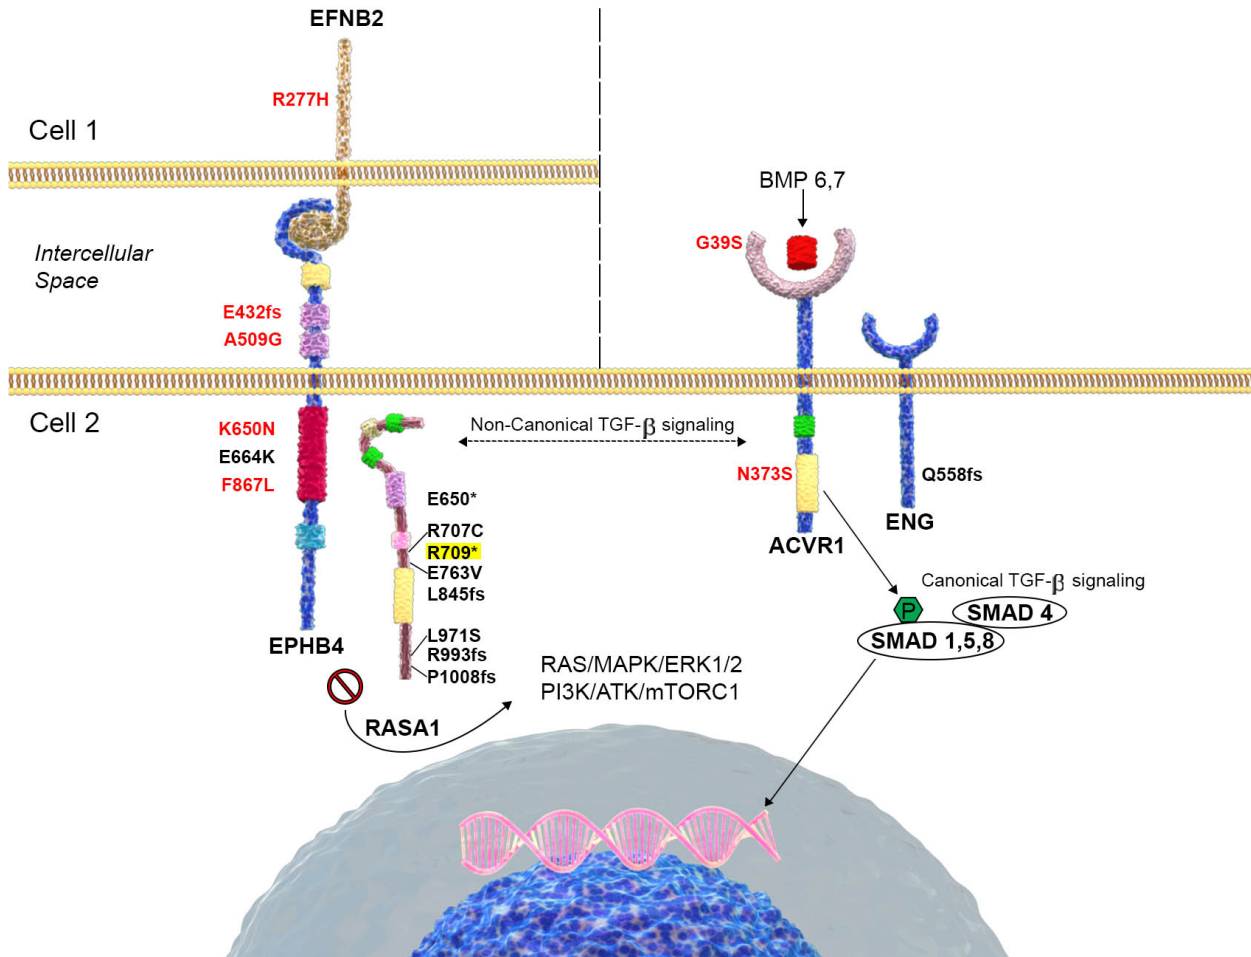

Schematic representation of signaling between two primitive endothelial cells showing contact-mediated interaction between the membrane-bound ligand Ephrin-B2 in the upper cell and its receptor, Eph-B4, in the lower cell. The figure depicts crosstalk between Eph-B4, its effector and binding partner RASA1, and activin type 1 receptors mediated by non-canonical TGF-β signaling. Mutations discovered in our cohort affecting *EPHB4*, *EFNB2*, and *ACVR1* are shown in red, and previously reported mutations in *RASA1*, *EPHB4*, and *ENG* in VOGM patients are indicated in black. *RASA1* p.Arg709\* (highlighted in yellow) is the sole *RASA1* mutation detected in our cohort.

## SUPPLEMENTARY TABLES

| <b>Supplementary Table 1. VOGM patient clinical and demographic characteristics, Related to STAR Methods</b> |                      |                   |                        |
|--------------------------------------------------------------------------------------------------------------|----------------------|-------------------|------------------------|
| <b>Variable</b>                                                                                              | <b>Type of VOGM</b>  |                   | <b>Grand Total (%)</b> |
|                                                                                                              | <i>Choroidal (%)</i> | <i>Mural (%)</i>  |                        |
|                                                                                                              | <b>37 (67.27)</b>    | <b>18 (32.73)</b> | <b>55 (100.00)</b>     |
| <b>Gender</b>                                                                                                |                      |                   |                        |
| Female                                                                                                       | 11 (29.73)           | 8 (44.44)         | 19 (34.55)             |
| Male                                                                                                         | 26 (70.27)           | 10 (55.56)        | 36 (65.45)             |
| <b>Total</b>                                                                                                 | 37 (100.00)          | 18 (100.00)       | 55 (100.00)            |
| <b>Age at diagnosis</b>                                                                                      |                      |                   |                        |
| Prenatal                                                                                                     | 15 (40.54)           | 7 (38.89)         | 22 (40.00)             |
| Neonate (0-30 days)                                                                                          | 12 (32.43)           | 0 (0.00)          | 12 (21.82)             |
| Infant (1 month-2 years)                                                                                     | 9 (24.32)            | 10 (55.56)        | 19 (34.55)             |
| Postnatal                                                                                                    | 0 (0.00)             | 0 (0.00)          | 0 (0.00)               |
| Young child (3-6 years)                                                                                      | 0 (0.00)             | 0 (0.00)          | 0 (0.00)               |
| Child (7-12 years)                                                                                           | 1 (2.70)             | 0 (0.00)          | 1 (1.82)               |
| Adolescent (13-17 years)                                                                                     | 0 (0.00)             | 0 (0.00)          | 0 (0.00)               |
| Unknown                                                                                                      | 0 (0.00)             | 1 (5.56)          | 1 (1.82)               |
| <b>Total</b>                                                                                                 | 37 (100.00)          | 18 (100.00)       | 55 (100.00)            |
| <b>Term vs. preterm delivery</b>                                                                             |                      |                   |                        |
| Term ( $\geq$ 37 wks)                                                                                        | 32 (86.49)           | 13 (72.22)        | 45 (81.82)             |
| Preterm                                                                                                      | 4 (10.81)            | 4 (22.22)         | 8 (14.55)              |
| Unknown                                                                                                      | 1 (2.70)             | 1 (5.56)          | 2 (3.64)               |
| <b>Total</b>                                                                                                 | 37 (100.00)          | 18 (100.00)       | 55 (100.00)            |
| <b>Family history of cutaneous vascular abnormalities*</b>                                                   |                      |                   |                        |
| Yes                                                                                                          | 23 (62.16)           | 8 (44.44)         | 31 (56.36)             |
| No                                                                                                           | 7 (18.92)            | 7 (38.89)         | 14 (25.45)             |
| Unknown                                                                                                      | 7 (18.92)            | 3 (16.67)         | 10 (18.18)             |
| <b>Total</b>                                                                                                 | 37 (100.00)          | 18 (100.00)       | 55 (100.00)            |
| <b>Self-reported ethnicity</b>                                                                               |                      |                   |                        |
| European                                                                                                     | 29 (78.38)           | 13 (72.22)        | 42 (76.36)             |
| European/Asian                                                                                               | 3 (8.11)             | 1 (5.56)          | 4 (7.27)               |
| Mixed                                                                                                        | 1 (2.70)             | 1 (5.56)          | 2 (3.64)               |
| European/Hispanic                                                                                            | 1 (2.70)             | 0 (0.00)          | 1 (1.82)               |
| Latin American/African American                                                                              | 1 (2.70)             | 0 (0.00)          | 1 (1.82)               |
| Asian                                                                                                        | 0 (0.00)             | 2 (11.11)         | 2 (3.64)               |
| African                                                                                                      | 0 (0.00)             | 1 (5.56)          | 1 (1.82)               |
| Ashkenazi Jewish                                                                                             | 2 (5.41)             | 0 (0.00)          | 2 (3.64)               |
| Unknown                                                                                                      | 2 (5.41)             | 0 (0.00)          | 2 (3.64)               |
| <b>Total</b>                                                                                                 | 37 (100.00)          | 18 (100.00)       | 55 (100.00)            |
| <b>Associated conditions</b>                                                                                 |                      |                   | <b>Total</b>           |
| High output cardiac failure                                                                                  | 23 (62.16)           | 1 (5.56)          | 24 (43.64)             |
| Progressive macrocephaly                                                                                     | 22 (59.46)           | 13 (72.22)        | 35 (63.64)             |
| Hydrocephalus                                                                                                | 24 (64.86)           | 9 (50.00)         | 33 (60.00)             |
| Prominent facial or scalp vasculature                                                                        | 18 (48.65)           | 9 (50.00)         | 27 (49.09)             |
| Structural cardiac abnormalities†                                                                            | 4 (10.81)            | 1 (5.56)          | 5 (9.09)               |

\*History of vascular birthmarks was self-reported in most cases, including first and second-degree relatives.

†Structural cardiac abnormalities include atrial septal defects, congenital valvular insufficiency, partial anomalous pulmonary venous return, patent foramen ovale, patent ductus arteriosus, and congenital pulmonary artery stenosis.

| Category                                  | Cases*       | Cases*           | Controls            |
|-------------------------------------------|--------------|------------------|---------------------|
|                                           | (xGen; N=88) | (MedExome; N=71) | (Roche V2; N=5,367) |
| Read length (bp)                          | 99           | 99               | 50-94               |
| # of reads per sample (M)                 | 48.9         | 53.7             | 99.7                |
| Median coverage at each targeted base (X) | 54.4         | 37.2             | 67                  |
| Mean coverage at each targeted base (X)   | 59.4         | 43.8             | 79.1                |
| % of all reads that map to target         | 60.70%       | 48.30%           | 57.60%              |
| % of all bases that map to target         | 46.10%       | 39.10%           | 49.00%              |
| % of targeted bases read at least 8x      | 98.40%       | 96.30%           | 94.60%              |
| % of targeted bases read at least 10x     | 98.00%       | 95.00%           | 93.40%              |
| % of targeted bases read at least 15x     | 96.30%       | 89.80%           | 89.90%              |
| % Mean error rate                         | 0.30%        | 0.30%            | 0.40%               |

\*88 VOGM samples were sequenced using the xGen Exome Research Panel v1.0 capture reagent (IDT). The remaining cases were sequenced using the MedExome capture reagent. 8X, 10X and 15X were comparable across the platforms.

| Cases, N = 52   |                  |      |          |      |            |         | Controls, N = 1,789 |                  |      |          |      |            |         |
|-----------------|------------------|------|----------|------|------------|---------|---------------------|------------------|------|----------|------|------------|---------|
|                 | Observed         |      | Expected |      | Enrichment | p-value |                     | Observed         |      | Expected |      | Enrichment | p-value |
|                 | N                | Rate | N        | Rate |            |         |                     | N                | Rate |          |      |            |         |
|                 | <b>All Genes</b> |      |          |      |            |         |                     | <b>All Genes</b> |      |          |      |            |         |
| <b>Total</b>    | 63               | 1.21 | 58.10    | 1.12 | 1.08       | 0.28    | <b>Total</b>        | 1830             | 1.02 | 1949.9   | 1.09 | 0.94       | 1.00    |
| <b>Syn</b>      | 15               | 0.29 | 16.50    | 0.32 | 0.91       | 0.68    | <b>Syn</b>          | 484              | 0.27 | 549.6    | 0.31 | 0.88       | 1.00    |
| <b>D-Mis</b>    | 14               | 0.27 | 6.80     | 0.13 | 2.05       | 0.01    | <b>D-Mis</b>        | 222              | 0.12 | 232.8    | 0.13 | 0.95       | 0.77    |
| <b>T-Mis</b>    | 29               | 0.56 | 29.70    | 0.57 | 0.98       | 0.58    | <b>T-Mis</b>        | 974              | 0.54 | 993.3    | 0.56 | 0.98       | 0.73    |
| <b>LoF</b>      | 5                | 0.10 | 5.10     | 0.10 | 0.98       | 0.58    | <b>LoF</b>          | 150              | 0.08 | 174.3    | 0.10 | 0.86       | 0.97    |
| <b>Damaging</b> | 19               | 0.37 | 12.00    | 0.23 | 1.59       | 0.04    | <b>Damaging</b>     | 372              | 0.21 | 407.1    | 0.23 | 0.91       | 0.96    |

Syn = Synonymous single nucleotide variant; D-Mis = Missense variants with “D” annotation per MetaSVM; T-Mis = Missense variants with “T” or “.” annotation per MetaSVM; LoF = Predicted loss-of-function variants (canonical splice site, frameshift indels, stop gains, and stop losses); Damaging = D-mis and/or LoF.



| Supplementary Table 4. <i>De novo</i> burden analysis comparing cases to controls, Related to Table 1 |                               |                                      |                                           |                                      |                      |                      |
|-------------------------------------------------------------------------------------------------------|-------------------------------|--------------------------------------|-------------------------------------------|--------------------------------------|----------------------|----------------------|
|                                                                                                       | # of <i>de novo</i> mutations |                                      | # of <i>de novo</i> mutations per subject |                                      | Binomial P-value*    | Odds ratio (95% CI)# |
|                                                                                                       | Cases<br>N=52                 | Controls <sup>&amp;</sup><br>N=1,789 | Cases<br>N=52                             | Controls <sup>&amp;</sup><br>N=1,789 |                      |                      |
| <b>LoF-intolerant genes (n = 3,230)</b>                                                               |                               |                                      |                                           |                                      |                      |                      |
| Total                                                                                                 | 14                            | 597.9                                | 0.27                                      | 0.33                                 | 0.5                  | NA                   |
| Syn                                                                                                   | 2                             | 150.7                                | 0.04                                      | 0.08                                 | 0.38                 | NA                   |
| Mis                                                                                                   | 11                            | 402.1                                | 0.21                                      | 0.22                                 | 0.96                 | 2.06 (0.45 - 9.41)   |
| D-Mis                                                                                                 | 6                             | 75.9                                 | 0.12                                      | 0.04                                 | 0.03                 | 5.96 (1.17 - 30.22)  |
| LoF                                                                                                   | 1                             | 45.1                                 | 0.02                                      | 0.03                                 | 1                    | 1.67 (0.15 - 18.85)  |
| Damaging                                                                                              | 7                             | 121.0                                | 0.13                                      | 0.07                                 | 0.12                 | 4.36 (0.89 - 21.37)  |
| <b>All chromatin genes (n = 547)</b>                                                                  |                               |                                      |                                           |                                      |                      |                      |
| Total                                                                                                 | 4                             | 77.1                                 | 0.08                                      | 0.04                                 | 0.42                 | NA                   |
| Syn                                                                                                   | 0                             | 14.2                                 | 0.00                                      | 0.01                                 | 1                    | NA                   |
| Mis                                                                                                   | 3                             | 55.8                                 | 0.06                                      | 0.03                                 | 0.51                 | NA                   |
| D-Mis                                                                                                 | 3                             | 14.2                                 | 0.06                                      | 0.01                                 | 3.4x10 <sup>-3</sup> | NA                   |
| LoF                                                                                                   | 1                             | 7.1                                  | 0.02                                      | 0.00                                 | 0.57                 | NA                   |
| Damaging                                                                                              | 4                             | 21.4                                 | 0.08                                      | 0.01                                 | 8.6x10 <sup>-4</sup> | NA                   |
| <b>LoF-intolerant chromatin genes (n = 272)</b>                                                       |                               |                                      |                                           |                                      |                      |                      |
| Total                                                                                                 | 4                             | 55.8                                 | 0.08                                      | 0.03                                 | 0.16                 | NA                   |
| Syn                                                                                                   | 0                             | 10.7                                 | 0.00                                      | 0.01                                 | 1                    | NA                   |
| Mis                                                                                                   | 3                             | 41.5                                 | 0.06                                      | 0.02                                 | 0.26                 | NA                   |
| D-Mis                                                                                                 | 3                             | 8.3                                  | 0.06                                      | 0.00                                 | 9.0x10 <sup>-5</sup> | NA                   |
| LoF                                                                                                   | 1                             | 3.6                                  | 0.02                                      | 0.00                                 | 0.3                  | NA                   |
| Damaging                                                                                              | 4                             | 11.9                                 | 0.08                                      | 0.01                                 | 3.9x10 <sup>-6</sup> | NA                   |

<sup>&</sup> Due to the difference in the *de novo* mutation rates between cases and controls, we adjusted the *de novo* mutation rate in controls to match the per-person rate by dividing the original rate per control by 0.84 (=1.02/1.21).

\* The p-values compare the number of *de novo* mutations between 52 case trios and 1,789 control trios using a two-tailed binomial exact test as shown previously (Sanders et al. 2012 Nature; Zaidi et al. 2013 Nature).

# The odds ratio calculates the proportion of *de novo* mutations in a specific category to synonymous *de novo* mutations and then compare these ratios in case trios versus control trios. NA, not applicable.

| Supplementary Table 5. Damaging <i>de novo</i> mutation in loss-of-function intolerant chromatin modifier genes in 55 cases, Related to Table 1 |                |                   |           |                |              |                       |      |                  |                                    |      |                                              |              |                                                      |                                               |                                    |                                    |                                |
|-------------------------------------------------------------------------------------------------------------------------------------------------|----------------|-------------------|-----------|----------------|--------------|-----------------------|------|------------------|------------------------------------|------|----------------------------------------------|--------------|------------------------------------------------------|-----------------------------------------------|------------------------------------|------------------------------------|--------------------------------|
| Salient genetic information                                                                                                                     |                |                   |           |                |              |                       |      |                  |                                    |      | Salient clinical and segregation information |              |                                                      |                                               |                                    |                                    |                                |
| Proband code                                                                                                                                    | Gene           | Coordinate (hg19) | Ethnicity | Inheritance    | AA Change    | gnomAD combined MAF** | pLI  | Missense Z-score | OMIM phenotype                     | CADD | MetaS VM                                     | Type of VOGM | Cutaneous manifestations or non CNS AVMs in kindred? | Vascular cutaneous manifestations on proband? | Vascular Birthmarks/AVMs on mother | Vascular Birthmarks/AVMs on father | Concordance with mutation type |
| KVGAM38                                                                                                                                         | <i>KAT6A</i>   | 8:41832271:G:A    | Mexican   | <i>De novo</i> | p.Thr478Ile  | <4.11E-06             | 1.00 | 2.14             | Mental retardation (AD)            | 24.2 | D                                            | Choroidal    | y                                                    | y                                             | n                                  | n                                  | y                              |
| KVGAM26                                                                                                                                         | <i>KMT2D</i>   | 12:49420060:C:T   | European  | <i>De novo</i> | p.Cys5230Tyr | <4.06E-06             | 1.00 | 3.10             | Kabuki syndrome (AD)               | 22.4 | D                                            | Choroidal    | y                                                    | y                                             | n                                  | n                                  | y                              |
| KVGAM20*                                                                                                                                        | <i>SIRT1</i>   | 10:69666624:TC:T  | European  | <i>De novo</i> | p.Arg341fs5  | <3.63E-06             | 0.95 | 0.58             | None                               | .    | N/A                                          | Choroidal    | y                                                    | y                                             | y                                  | n                                  | n                              |
| KVGAM29                                                                                                                                         | <i>SMARCA2</i> | 9:2086866:G:T     | European  | <i>De novo</i> | p.Arg855Leu  | <4.06E-06             | 1.00 | 5.57             | Nicolaidis-Baraitser syndrome (AD) | 26.5 | D                                            | Mural        | n                                                    | n                                             | n                                  | n                                  | N/A                            |

\* This subject also carried a p.Val143Met mutation in CLDN14 transmitted from mother

\*\* For variants not observed in public databases, their minor allele frequency is calculated as less than 1 out of total number of alleles sampled at the closest locus with allele number available

| Gene          | Case            |              | Control         |              | Fisher p value | Odds ratio |
|---------------|-----------------|--------------|-----------------|--------------|----------------|------------|
|               | # mutant allele | # ref allele | # mutant allele | # ref allele |                |            |
| <i>EPHB4</i>  | 4               | 106          | 3               | 7,153        | 1.68E-06       | 89.97      |
| <i>MYH7</i>   | 3               | 107          | 0               | 7,156        | 3.38E-06       | Inf        |
| <i>AOC2</i>   | 3               | 107          | 0               | 7,156        | 3.38E-06       | Inf        |
| <i>CLDN14</i> | 3               | 107          | 0               | 7,156        | 3.38E-06       | Inf        |
| <i>OTOG</i>   | 2               | 108          | 0               | 7,156        | 2.27E-04       | Inf        |
| <i>NALCN</i>  | 2               | 108          | 0               | 7,156        | 2.27E-04       | Inf        |
| <i>LTBP2</i>  | 2               | 108          | 0               | 7,156        | 2.27E-04       | Inf        |
| <i>MLH3</i>   | 2               | 108          | 0               | 7,156        | 2.27E-04       | Inf        |
| <i>PKM</i>    | 2               | 108          | 0               | 7,156        | 2.27E-04       | Inf        |
| <i>TPSG1</i>  | 2               | 108          | 0               | 7,156        | 2.27E-04       | Inf        |

| Gene           | Case            |              | Control         |              | Fisher p value | Odds ratio |
|----------------|-----------------|--------------|-----------------|--------------|----------------|------------|
|                | # mutant allele | # ref allele | # mutant allele | # ref allele |                |            |
| <i>EPHB4</i>   | 4               | 106          | 92              | 121,318      | 1.98E-06       | 49.76      |
| <i>AOC2</i>    | 3               | 107          | 39              | 121,373      | 8.07E-06       | 87.26      |
| <i>CLDN14</i>  | 3               | 107          | 50              | 120,946      | 1.65E-05       | 67.82      |
| <i>MPST</i>    | 2               | 108          | 17              | 116,829      | 1.48E-04       | 127.26     |
| <i>DNAH12</i>  | 2               | 108          | 37              | 121,367      | 5.89E-04       | 60.74      |
| <i>EMILIN3</i> | 2               | 108          | 40              | 121,192      | 6.85E-04       | 56.11      |
| <i>ABHD17A</i> | 2               | 108          | 42              | 118,070      | 7.91E-04       | 52.06      |
| <i>PRKDC</i>   | 1               | 109          | 0               | 121,412      | 9.05E-04       | Inf        |
| <i>SEPT1</i>   | 1               | 109          | 0               | 121,412      | 9.05E-04       | Inf        |
| <i>ADGRL4</i>  | 2               | 108          | 50              | 120,618      | 1.06E-03       | 44.67      |

| Rank     | Ingenuity Canonical Pathways              | P-value         | Corrected P-value | Ratio       | Genes                                                                                                            |
|----------|-------------------------------------------|-----------------|-------------------|-------------|------------------------------------------------------------------------------------------------------------------|
| <b>1</b> | <b>Axonal Guidance Signaling</b>          | <b>6.61E-08</b> | <b>1.33E-05</b>   | <b>0.03</b> | <b><i>SLIT3, ITGB1, SHH, EPHB4, NGEF, ITSNI, EPHA4, KEL, SLIT2, ADAMTS2, MET, EPHA6, SHANK2, RASA1, NRPI</i></b> |
| 2        | nNOS Signaling in Skeletal Muscle Cells   | 1.32E-07        | 2.64E-05          | 0.15        | <i>CACNA1G, CACNG2, CACNA1B, RYR2, CACNA2D3, CACNA1A</i>                                                         |
| 3        | GABA Receptor Signaling                   | 1.41E-06        | 2.81E-04          | 0.07        | <i>CACNA1G, CACNG2, CACNA1B, GABRB1, KCNH2, CACNA2D3, CACNA1A</i>                                                |
| 4        | Netrin Signaling                          | 2.19E-06        | 4.34E-04          | 0.09        | <i>CACNA1G, CACNG2, CACNA1B, RYR2, CACNA2D3, CACNA1A</i>                                                         |
| 5        | FcγRIIB Signaling in B Lymphocytes        | 6.92E-06        | 1.36E-03          | 0.08        | <i>CACNA1G, CACNG2, CD79B, CACNA1B, CACNA2D3, CACNA1A</i>                                                        |
| 6        | Corticotropin Releasing Hormone Signaling | 1.74E-05        | 3.41E-03          | 0.05        | <i>CACNA1G, CACNG2, SHH, CACNA1B, KRT1, CACNA2D3, CACNA1A</i>                                                    |
| 7        | G Beta Gamma Signaling                    | 5.62E-05        | 0.01              | 0.05        | <i>CACNA1G, CACNG2, CACNA1B, CACNA2D3, CACNA1A, DNM2</i>                                                         |
| 8        | Synaptic Long Term Depression             | 7.41E-05        | 0.01              | 0.04        | <i>CACNA1G, CACNG2, CACNA1B, RYR2, PPP2R2B, CACNA2D3, CACNA1A</i>                                                |
| <b>9</b> | <b>Ephrin Receptor Signaling</b>          | <b>7.59E-05</b> | <b>0.01</b>       | <b>0.04</b> | <b><i>ITGB1, EPHA6, NGEF, EPHB4, ITSNI, EPHA4, RASA1</i></b>                                                     |
| 10       | Androgen Signaling                        | 1.55E-04        | 0.03              | 0.04        | <i>CACNA1G, CACNG2, CACNA1B, POLR2H, CACNA2D3, CACNA1A</i>                                                       |
| 11       | CCR5 Signaling in Macrophages             | 2.40E-04        | 0.05              | 0.05        | <i>CACNA1G, CACNG2, CACNA1B, CACNA2D3, CACNA1A</i>                                                               |

| Supplementary Table 8. Mutation burden in cases compared to European ethnicity-matched controls in IPA-determined significant pathways, Related to Table 1 and Figure 3 |                                                    |              |                 |           |                  |                    |               |             |                    |                 |  |  |
|-------------------------------------------------------------------------------------------------------------------------------------------------------------------------|----------------------------------------------------|--------------|-----------------|-----------|------------------|--------------------|---------------|-------------|--------------------|-----------------|--|--|
| Control_Group                                                                                                                                                           | Pathway (# of intolerant genes)                    | Case_Carrier | Case_NonCarrier | CaseTotal | Control_Carrier* | Control_NonCarrier | ControlTotal  | Enrichment  | Confident_Interval | p-value         |  |  |
| Autism                                                                                                                                                                  | nNOS Signaling in Skeletal Muscle Cells (n = 18)   | 4            | 41              | 45        | 196              | 2,690              | 2,886         | 1.34        | [0.43, Inf]        | 0.37            |  |  |
| <b>Autism</b>                                                                                                                                                           | <b>Axonal Guidance Signaling (n = 161)</b>         | <b>14</b>    | <b>31</b>       | <b>45</b> | <b>279</b>       | <b>2,607</b>       | <b>2,886</b>  | <b>4.22</b> | <b>[2.29, Inf]</b> | <b>6.94E-05</b> |  |  |
| <b>Autism</b>                                                                                                                                                           | <b>Ephrin Receptor Signaling (n = 73)</b>          | <b>8</b>     | <b>37</b>       | <b>45</b> | <b>127</b>       | <b>2,759</b>       | <b>2,886</b>  | <b>4.69</b> | <b>[2.15, Inf]</b> | <b>8.36E-04</b> |  |  |
| Autism                                                                                                                                                                  | Androgen Signaling (n = 55)                        | 4            | 41              | 45        | 193              | 2,693              | 2,886         | 1.36        | [0.44, Inf]        | 0.36            |  |  |
| Autism                                                                                                                                                                  | CCR5 Signaling in Macrophages (n = 31)             | 3            | 42              | 45        | 138              | 2,748              | 2,886         | 1.42        | [0.37, Inf]        | 0.37            |  |  |
| Autism                                                                                                                                                                  | Corticotropin Releasing Hormone Signaling (n = 57) | 5            | 40              | 45        | 244              | 2,642              | 2,886         | 1.35        | [0.5, Inf]         | 0.33            |  |  |
| Autism                                                                                                                                                                  | FcγRIIB Signaling in B Lymphocytes (n = 36)        | 3            | 42              | 45        | 149              | 2,737              | 2,886         | 1.31        | [0.34, Inf]        | 0.42            |  |  |
| Autism                                                                                                                                                                  | G Beta Gamma Signaling (n = 53)                    | 4            | 41              | 45        | 189              | 2,697              | 2,886         | 1.39        | [0.45, Inf]        | 0.34            |  |  |
| Autism                                                                                                                                                                  | GABA Receptor Signaling (n = 45)                   | 6            | 39              | 45        | 175              | 2,711              | 2,886         | 2.38        | [0.97, Inf]        | 0.06            |  |  |
| Autism                                                                                                                                                                  | Netrin Signaling (n = 32)                          | 4            | 41              | 45        | 212              | 2,674              | 2,886         | 1.23        | [0.4, Inf]         | 0.43            |  |  |
| Autism                                                                                                                                                                  | Synaptic Long Term Depression (n = 65)             | 5            | 40              | 45        | 289              | 2,597              | 2,886         | 1.12        | [0.42, Inf]        | 0.48            |  |  |
| ExAC                                                                                                                                                                    | nNOS Signaling in Skeletal Muscle Cells (n = 18)   | 4            | 41              | 45        | 3,145            | 33,532             | 36,677        | 1.04        | [0.34, Inf]        | 0.55            |  |  |
| <b>ExAC</b>                                                                                                                                                             | <b>Axonal Guidance Signaling (n = 161)</b>         | <b>14</b>    | <b>31</b>       | <b>45</b> | <b>3,878</b>     | <b>32,799</b>      | <b>36,677</b> | <b>3.82</b> | <b>[2.1, Inf]</b>  | <b>1.52E-04</b> |  |  |
| <b>ExAC</b>                                                                                                                                                             | <b>Ephrin Receptor Signaling (n = 73)</b>          | <b>8</b>     | <b>37</b>       | <b>45</b> | <b>1,621</b>     | <b>35,056</b>      | <b>36,677</b> | <b>4.68</b> | <b>[2.18, Inf]</b> | <b>7.33E-04</b> |  |  |
| ExAC                                                                                                                                                                    | Androgen Signaling (n = 55)                        | 4            | 41              | 45        | 4,718            | 31,959             | 36,677        | 0.66        | [0.22, Inf]        | 0.85            |  |  |
| ExAC                                                                                                                                                                    | CCR5 Signaling in Macrophages (n = 31)             | 3            | 42              | 45        | 2,138            | 34,539             | 36,677        | 1.15        | [0.3, Inf]         | 0.49            |  |  |
| ExAC                                                                                                                                                                    | Corticotropin Releasing Hormone Signaling (n = 57) | 5            | 40              | 45        | 3,466            | 33,211             | 36,677        | 1.20        | [0.45, Inf]        | 0.42            |  |  |
| ExAC                                                                                                                                                                    | FcγRIIB Signaling in B Lymphocytes (n = 36)        | 3            | 42              | 45        | 2,321            | 34,356             | 36,677        | 1.06        | [0.28, Inf]        | 0.55            |  |  |
| ExAC                                                                                                                                                                    | G Beta Gamma Signaling (n = 53)                    | 4            | 41              | 45        | 2,726            | 33,951             | 36,677        | 1.22        | [0.4, Inf]         | 0.43            |  |  |
| ExAC                                                                                                                                                                    | GABA Receptor Signaling (n = 45)                   | 6            | 39              | 45        | 2,995            | 33,682             | 36,677        | 1.73        | [0.71, Inf]        | 0.16            |  |  |
| ExAC                                                                                                                                                                    | Netrin Signaling (n = 32)                          | 4            | 41              | 45        | 3,361            | 33,316             | 36,677        | 0.97        | [0.32, Inf]        | 0.60            |  |  |
| ExAC                                                                                                                                                                    | Synaptic Long Term Depression (n = 65)             | 5            | 40              | 45        | 4,494            | 32,183             | 36,677        | 0.89        | [0.34, Inf]        | 0.66            |  |  |

P values were calculated using the one-tailed Fisher's Exact Test. Values in red bold are P values exceeding the Bonferroni multiple-testing cutoff ( $0.05/(2 \times 11) = 2.27E-03$ )

\* ExAC database does not provide individual level information, number of damaging mutations in each gene set carried by each individual was assumed to be 1.

| Supplementary Table 9. Gene burden in cases compared to expectation for axonal guidance and Ephrin receptor signaling pathways, Related to Table 1 and Figure 3 |          |          |            |                 |                                                                 |          |          |            |                 |  |  |  |
|-----------------------------------------------------------------------------------------------------------------------------------------------------------------|----------|----------|------------|-----------------|-----------------------------------------------------------------|----------|----------|------------|-----------------|--|--|--|
| Axon guidance signaling                                                                                                                                         |          |          |            |                 | Ephrin receptor signaling                                       |          |          |            |                 |  |  |  |
| LoF-intolerant genes with damaging mutations in VOGM cases                                                                                                      | Observed | Expected | Enrichment | p-value         | LoF-intolerant genes with damaging mutations in VOGM cases      | Observed | Expected | Enrichment | p-value         |  |  |  |
|                                                                                                                                                                 | 18       | 7.14     | 2.52       | <b>3.02E-04</b> |                                                                 | 10       | 2.90     | 3.45       | <b>7.28E-04</b> |  |  |  |
| LoF-intolerant genes with synonymous mutations in VOGM cases                                                                                                    | Observed | Expected | Enrichment | p-value         | LoF-intolerant genes with synonymous mutations in VOGM cases    | Observed | Expected | Enrichment | p-value         |  |  |  |
|                                                                                                                                                                 | 21       | 20.12    | 1.04       | 0.45            |                                                                 | 4        | 8.17     | 0.49       | 0.96            |  |  |  |
| LoF-intolerant genes with damaging mutations in autism controls                                                                                                 | Observed | Expected | Enrichment | p-value         | LoF-intolerant genes with damaging mutations in autism controls | Observed | Expected | Enrichment | p-value         |  |  |  |
|                                                                                                                                                                 | 372      | 348.77   | 1.07       | 0.11            |                                                                 | 166      | 141.56   | 1.17       | 0.02            |  |  |  |
| LoF-intolerant genes with damaging mutations in ExAC controls                                                                                                   | Observed | Expected | Enrichment | p-value         | LoF-intolerant genes with damaging mutations in ExAC controls   | Observed | Expected | Enrichment | p-value         |  |  |  |
|                                                                                                                                                                 | 3878     | 3967.08  | 0.98       | 0.93            |                                                                 | 1621     | 1611.57  | 1.01       | 0.41            |  |  |  |

P values were calculated using the one-tailed binomial test comparing observed number of variants in LoF-intolerant genes that belong to statistically significant canonical pathways of interest to the expected number of mutations in each set (see Methods). Values in bold red are P values exceeding the Bonferroni multiple-testing cutoff ( $0.05/(2 \times 3) = 0.008$ )

| Supplementary table 10a. Gene burden in cases compared to expectation for axonal guidance pathway after removing genes in the ephrin signaling pathway, Related to Table 1 and Figure 3 |          |          |            |         |
|-----------------------------------------------------------------------------------------------------------------------------------------------------------------------------------------|----------|----------|------------|---------|
| LoF-intolerant genes with damaging mutations in VOGM cases                                                                                                                              | Observed | Expected | Enrichment | p-value |
|                                                                                                                                                                                         | 8        | 6.66     | 1.2        | 0.35    |

P values were calculated using the one-tailed binomial test comparing observed number of variants in LoF-intolerant genes that belong to statistically significant canonical pathways of interest to the expected number of mutations in each set (see Methods).

| Supplementary Table 10b. Mutation burden in cases compared to European ethnicity-matched controls for axonal guidance pathway after removing genes in the ephrin signaling pathway, Related to Table 1 and Figure 3 |                                     |              |                 |           |                  |                    |              |            |                    |         |
|---------------------------------------------------------------------------------------------------------------------------------------------------------------------------------------------------------------------|-------------------------------------|--------------|-----------------|-----------|------------------|--------------------|--------------|------------|--------------------|---------|
| Control_Sample                                                                                                                                                                                                      | Pathway                             | Case_Carrier | Case_NonCarrier | CaseTotal | Control_Carrier* | Control_NonCarrier | ControlTotal | Enrichment | Confident_Interval | p-value |
| Autism                                                                                                                                                                                                              | Axonal Guidance Signaling (n = 161) | 6            | 39              | 45        | 197              | 2,689              | 2,886        | 2.10       | [0.86, Inf]        | 0.09    |
| ExAC                                                                                                                                                                                                                | Axonal Guidance Signaling (n = 161) | 6            | 39              | 45        | 2,726            | 33,951             | 36,677       | 1.92       | [0.79, Inf]        | 0.11    |

P values were calculated using the one-tailed Fisher's Exact Test. Bonferroni multiple-testing cutoff for this test is  $0.05/2 = 0.025$

\* ExAC database does not provide individual level information, number of damaging mutations in each gene set carried by each individual was assumed to be 1.



**Supplementary Table 11. Mutations in genes in the Ephrin receptor signaling pathway, Related to Table 1 and Figure 3**

| Proband code | Inheritance | Mutation Type | Gene         | Coordinate (hg19) | Coding sequence variant | AA Modification | ExAC MAF*  | gnomAD combined MAF* | pLI  | Missense Z-score | OMIM phenotype                                               | CADD | Meta SVM |
|--------------|-------------|---------------|--------------|-------------------|-------------------------|-----------------|------------|----------------------|------|------------------|--------------------------------------------------------------|------|----------|
| VGAM105      | Transmitted | LoF           | <i>ITGB1</i> | chr10:33196073    | N/A                     | Splice site     | < 8.27E-06 | < 4.15E-06           | 0.91 | 3.47             | None                                                         | 20.9 | N/A      |
| VGAM115      | Transmitted | LoF           | <i>EPHB4</i> | chr7:100417179    | c.1295_1296del          | p.Glu432fs1     | < 9.06E-06 | < 4.76E-06           | 0.99 | 2.84             | Non-immune hydrops fetalis with/without atrial septal defect | .    | D        |
| KVGAM25      | Transmitted | D-mis         |              | chr7:100414876    | c.1526C>G               | p.Ala509Gly     | 3.30E-05   | 1.13E-05             |      |                  |                                                              | 25   | D        |
| KVGAM33      | Transmitted | D-mis         |              | chr7:100410537    | c.1950G>T               | p.Lys650Asn     | < 8.24E-06 | < 4.06E-06           |      |                  |                                                              | 29.9 | D        |
| KVGAM18      | Transmitted | D-mis         |              | chr7:100403202    | c.2599T>C               | p.Phe867Leu     | < 9.03E-06 | < 5.17E-06           |      |                  |                                                              | 31   | D        |
| KVGAM55      | Transmitted | D-mis         | <i>NGEF</i>  | chr2:233745889    | c.1909G>A               | p.Asp637Asn     | 2.83E-05   | 1.22E-05             | 0.95 | 2.18             | None                                                         | 34   | D        |
| KVGAM7       | Transmitted | D-mis         | <i>ITSN1</i> | chr21:35260471    | c.5033C>T               | p.Thr1678Met    | 1.89E-05   | 8.13E-06             | 1.00 | 3.44             | None                                                         | 34   | D        |
| VGAM114      | Transmitted | D-mis         | <i>EPHA4</i> | chr2:222299011    | c.G2347G>A              | p.Gly783Ser     | < 8.28E-06 | < 4.07E-06           | 1.00 | 3.15             | None                                                         | 34   | D        |
| KVGAM45      | Transmitted | D-mis         | <i>EPHA6</i> | chr3:96706498     | c.775C>T                | p.Arg259Cys     | < 8.38E-06 | < 3.23E-05           | 0.95 | 0.93             | None                                                         | 34   | D        |
| KVGAM42      | Transmitted | LoF           | <i>RASA1</i> | chr5:86672323     | c.2125C>T               | p.Arg709*       | < 8.26E-06 | < 3.23E-05           | 1.00 | 2.96             | CM-AVM1; Parkes Weber Syndrome; Somatic basal cell carcinoma | 40   | N/A      |

\* For variants not observed in public databases, their minor allele frequency is calculated as less than 1 out of total number of alleles sampled at the closest locus with allele number available

**Supplementary Table 12. Transmitted VOGM mutations in Mendelian AVM genes, Related to Figure 3**

| Family  | Type of VOGM | Ethnicity | Gene                          | Mutation  | Domain affected  | ExAC MAF*  | gnomAD MAF* | pLI  | MetaSVM | CADD |
|---------|--------------|-----------|-------------------------------|-----------|------------------|------------|-------------|------|---------|------|
| KVGAM6  | Mural        | European  | <i>ACVRI</i> <sup>&amp;</sup> | p.(G39S)  | Activin receptor | < 8.24E-06 | 3.24E-05    | 0.96 | D       | 24.8 |
| KVGAM44 | Mural        | European  | <i>ACVRI</i> <sup>&amp;</sup> | p.(N373S) | Kinase domain    | < 8.26E-06 | < 4.07E-06  | 0.96 | T       | 24.1 |
| VGAM100 | Choroidal    | Mexican   | <i>ACVRL1</i>                 | p.(R484Q) | Kinase domain    | < 8.28E-06 | < 3.24E-05  | 0.01 | D       | 33   |

<sup>&</sup> *ACVRI* is a paralog of *ACVRL1*

\* For variants not observed in public databases, their minor allele frequency is calculated as less than 1 out of total number of alleles sampled at the closest locus with allele number available

Supplementary Table 13. Distribution of highly pathogenic mutations in VOGM patients with different subphenotypes, Related to Table 1, Figure 3, and STAR Methods

| Proband Code | Gender | Ethnicity    | Sub-Phenotype at Diagnosis (weeks) | Fetal Age | Postnatal Age at Diagnosis | Gene                           | Amino Acid Change          | Type                             | Transmission                  | Proband with Capillary Malformation | Relatives with Capillary Malformation | Other phenotypes                                                                                                                              |
|--------------|--------|--------------|------------------------------------|-----------|----------------------------|--------------------------------|----------------------------|----------------------------------|-------------------------------|-------------------------------------|---------------------------------------|-----------------------------------------------------------------------------------------------------------------------------------------------|
| KVGAM1       | M      | European     | Choroidal                          |           | 7 mo.                      |                                |                            |                                  |                               | n                                   | n                                     | Neurodevelopmental delay                                                                                                                      |
| KVGAM10      | M      | European     | Choroidal                          | 34        |                            | <i>KEL</i>                     | p.Gln321*                  | stopgain                         | <i>De novo</i>                | n                                   | y                                     | Pulmonary hypertension, neurodevelopmental delay                                                                                              |
| KVGAM15      | M      | European     | Choroidal                          |           | 3 d.                       |                                |                            |                                  |                               | n                                   | y                                     | Patent ductus arteriosus, neurodevelopmental delay                                                                                            |
| KVGAM18      | M      | European     | Choroidal                          | 40        |                            | <i>EPHB4</i>                   | p.Phe867Leu                | Dmis                             | Transmitted                   | n                                   | y                                     | Cryptorchidism, strabismus, cerebral palsy                                                                                                    |
| KVGAM2       | M      | Undetermined | Choroidal                          | 33        |                            |                                |                            |                                  |                               | n                                   | n                                     | n                                                                                                                                             |
| KVGAM20      | F      | European     | Choroidal                          |           | 6 mo.                      | <i>CLDN14</i><br><i>SIRT1</i>  | p.Val143Met<br>p.Arg341fs5 | Dmis<br>Frameshift deletion      | Transmitted<br><i>De novo</i> | y                                   | y                                     | n                                                                                                                                             |
| KVGAM22      | F      | European     | Choroidal                          |           | 5 mo.                      |                                |                            |                                  |                               | n                                   | n                                     | n                                                                                                                                             |
| KVGAM24      | M      | European     | Choroidal                          |           | 8 yr.                      |                                |                            |                                  |                               | n                                   | n                                     | Recurrent epistaxis                                                                                                                           |
| KVGAM25      | M      | European     | Choroidal                          |           | 19 d.                      | <i>EPHB4</i>                   | p.Ala509Gly                | Dmis                             | Transmitted                   | n                                   | n                                     | Pectus excavatum                                                                                                                              |
| KVGAM26      | M      | European     | Choroidal                          |           | 1 d.                       | <i>KMT2D</i>                   | p.Cys5230Tyr               | Dmis                             | <i>De novo</i>                | n                                   | n                                     | Hypothyroidism, low set ears, long and everted palpebral fissures, neurodevelopmental delay, seizures                                         |
| KVGAM30      | M      | European     | Choroidal                          |           | 5 d.                       |                                |                            |                                  |                               | n                                   | y                                     | Neurodevelopmental delay, seizures                                                                                                            |
| KVGAM31      | F      | European     | Choroidal                          |           | 11 mo.                     |                                |                            |                                  |                               | n                                   | n                                     | Neurodevelopmental delay                                                                                                                      |
| KVGAM32      | M      | European     | Choroidal                          |           | 7 d.                       |                                |                            |                                  |                               | n                                   | y                                     | n                                                                                                                                             |
| KVGAM33      | F      | Mexican      | Choroidal                          |           | 1 d.                       | <i>EPHB4</i>                   | p.Lys650Asn                | Dmis                             | Transmitted                   | n                                   | y                                     | Neurodevelopmental delay                                                                                                                      |
| KVGAM34      | M      | European     | Choroidal                          | 35        |                            |                                |                            |                                  |                               | n                                   | n                                     | Neurodevelopmental delay, attention deficit hyperactivity disorder                                                                            |
| KVGAM35      | M      | European     | Choroidal                          | 37        |                            |                                |                            |                                  |                               | n                                   | n                                     | n                                                                                                                                             |
| KVGAM37      | M      | European     | Choroidal                          | 36        |                            |                                |                            |                                  |                               | n                                   | y                                     | Neurodevelopmental delay                                                                                                                      |
| KVGAM38      | M      | Mexican      | Choroidal                          |           | 6 d.                       | <i>KAT6A</i>                   | p.Thr478Ile                | Dmis                             | <i>De novo</i>                | y                                   | n                                     | Neurodevelopmental delay, seizures                                                                                                            |
| KVGAM4       | M      | Undetermined | Choroidal                          |           | 2 d.                       |                                |                            |                                  |                               | n                                   | n                                     | n                                                                                                                                             |
| KVGAM40      | M      | European     | Choroidal                          |           | 3 mo.                      |                                |                            |                                  |                               | n                                   | y                                     | Cerebral palsy, hip dysplasia, visual impairment, gastroesophageal reflux disease, neurodevelopmental delay, seizures                         |
| KVGAM52      | F      | European     | Choroidal                          | 32        |                            |                                |                            |                                  |                               | n                                   | n                                     | n                                                                                                                                             |
| KVGAM54      | F      | European     | Choroidal                          | 38        |                            |                                |                            |                                  |                               | n                                   | y                                     | n                                                                                                                                             |
| KVGAM55      | F      | European     | Mural                              | 20        |                            | <i>NGEF</i>                    | p.Asp637Asn                | Dmis                             | Transmitted                   | n                                   | n                                     | n                                                                                                                                             |
| KVGAM7       | F      | European     | Choroidal                          |           | 1 yr.                      | <i>ITSN1</i>                   | p.Thr1678Met               | Dmis                             | Transmitted                   | n                                   | y                                     | Pulmonary valve stenosis, neurodevelopmental delay                                                                                            |
| KVGAM8       | M      | European     | Choroidal                          | 39        |                            |                                |                            |                                  |                               | n                                   | y                                     | Neurodevelopmental delay, seizures                                                                                                            |
| KVGAM9       | F      | European     | Choroidal                          | 38        |                            |                                |                            |                                  |                               | n                                   | n                                     | Patent ductus arteriosus, patent foramen ovale, seizures                                                                                      |
| VGAM100      | F      | Mexican      | Choroidal                          | 34        |                            | <i>ACVRL1</i><br><i>CLDN14</i> | p.R484Q<br>p.Ala113Pro     | Dmis<br>Dmis                     | Transmitted<br>Transmitted    | n                                   | n                                     | Strabismus                                                                                                                                    |
| VGAM101      | M      | European     | Choroidal                          | 36        |                            | <i>EFNB2</i>                   | p.Arg277His                | Dmis                             | Transmitted                   | y                                   | y                                     | Hip dysplasia, neurodevelopmental delay, seizures                                                                                             |
| VGAM104      | M      | European     | Choroidal                          |           | 3 d.                       |                                |                            |                                  |                               | y                                   | n                                     | Cerebral palsy, neurodevelopmental delay                                                                                                      |
| VGAM107      | F      | European     | Choroidal                          |           | 4 d.                       |                                |                            |                                  |                               | n                                   | n                                     | Medulloblastoma, seizures                                                                                                                     |
| VGAM108      | M      | European     | Choroidal                          |           | 2 mo.                      |                                |                            |                                  |                               | n                                   | y                                     | Asthma                                                                                                                                        |
| VGAM109      | M      | Mexican      | Choroidal                          |           | 3 d.                       |                                |                            |                                  |                               | y                                   | y                                     | Cerebral palsy, neurodevelopmental delay, seizures                                                                                            |
| VGAM111      | M      | European     | Choroidal                          | 31        |                            |                                |                            |                                  |                               | n                                   | n                                     | Cerebral palsy, gastroesophageal reflux disease, renal agenesis, precocious puberty, mitral insufficiency, neurodevelopmental delay, seizures |
| VGAM112      | M      | European     | Choroidal                          | 36        |                            |                                |                            |                                  |                               | n                                   | n                                     | n                                                                                                                                             |
| VGAM113      | M      | European     | Choroidal                          |           | 2 d.                       |                                |                            |                                  |                               | n                                   | n                                     | Chiari Type I malformation                                                                                                                    |
| VGAM114      | F      | European     | Choroidal                          |           | 11 mo.                     | <i>EPHA4</i>                   | p.Gly783Ser                | Dmis                             | Transmitted                   | y                                   | y                                     | n                                                                                                                                             |
| VGAM115      | M      | European     | Choroidal                          |           | 3 mo.                      | <i>EPHB4</i>                   | p.Glu432fs1                | Frameshift deletion              | Transmitted                   | n                                   | y                                     | Neurodevelopmental delay, seizures                                                                                                            |
| VGAM47       | M      | European     | Choroidal                          | 29        |                            |                                |                            |                                  |                               | n                                   | n                                     | Hypospadias                                                                                                                                   |
| KVGAM11      | M      | European     | Mural                              |           | 6 mo.                      |                                |                            |                                  |                               | n                                   | y                                     | n                                                                                                                                             |
| KVGAM29      | M      | European     | Mural                              | 38        |                            | <i>SMARCA2</i>                 | p.Arg855Leu                | Dmis                             | <i>De novo</i>                | n                                   | n                                     | Seizures                                                                                                                                      |
| KVGAM3       | F      | European     | Mural                              | 31        |                            |                                |                            |                                  |                               | n                                   | n                                     | n                                                                                                                                             |
| KVGAM36      | F      | European     | Mural                              |           | 3 mo.                      |                                |                            |                                  |                               | n                                   | y                                     | n                                                                                                                                             |
| KVGAM41      | M      | European     | Mural                              |           | 14 mo.                     |                                |                            |                                  |                               | n                                   | y                                     | Major depressive disorder with psychotic features, attention deficit hyperactivity disorder, hydrocephalus, migraines                         |
| KVGAM42      | F      | Mexican      | Mural                              |           | 6 mo.                      | <i>RASA1</i>                   | p.Arg709*                  | stopgain                         | Transmitted                   | y                                   | y                                     | Cerebral palsy, seizures                                                                                                                      |
| KVGAM43      | M      | African      | Mural                              |           | 14 mo.                     |                                |                            |                                  |                               | n                                   | y                                     | n                                                                                                                                             |
| KVGAM44      | M      | European     | Mural                              |           | 9 mo.                      | <i>ACVRL1</i>                  | p.Asu373Ser                | T-mis (high CADD = 24.1)         | Transmitted                   | n                                   | y                                     | Atrial septal defect, partial anomalous pulmonary venous return                                                                               |
| KVGAM45      | F      | European     | Mural                              |           | 6 mo.                      | <i>EPHA6</i><br><i>KEL</i>     | p.Arg259Cys<br>p.Gly202Ser | Dmis<br>T-mis (high CADD = 22.6) | Transmitted<br><i>De novo</i> | n                                   | n                                     | Neurodevelopmental delay, seizures                                                                                                            |
| KVGAM49      | M      | Undetermined | Mural                              |           | 16 mo.                     |                                |                            |                                  |                               | n                                   | n                                     | n                                                                                                                                             |
| KVGAM5       | M      | Mexican      | Mural                              | 28        |                            |                                |                            |                                  |                               | n                                   | n                                     | Cystic fibrosis                                                                                                                               |
| KVGAM51      | F      | European     | Mural                              | 31        |                            | <i>CLDN14</i>                  | p.Val143Met                | Dmis                             | Transmitted                   | n                                   | n                                     | n                                                                                                                                             |
| KVGAM6       | F      | European     | Mural                              | 35        |                            | <i>ACVRL1</i>                  | p.Gly39Ser                 | Dmis                             | Transmitted                   | n                                   | n                                     | n                                                                                                                                             |
| VGAM102      | M      | European     | Mural                              |           | 3 d.                       |                                |                            |                                  |                               | n                                   | n                                     | Attention deficit hyperactivity disorder, recurrent epistaxis                                                                                 |
| VGAM105      | M      | European     | Mural                              |           | 2 mo.                      | <i>ITGB1</i>                   | Splice site                | splice site                      | Transmitted                   | n                                   | n                                     | Chiari Type I malformation                                                                                                                    |
| VGAM110      | F      | European     | Mural                              | 39        |                            |                                |                            |                                  |                               | y                                   | n                                     | n                                                                                                                                             |
| VGAM46       | M      | European     | Mural                              |           | 1 yr.                      |                                |                            |                                  |                               | n                                   | n                                     | n                                                                                                                                             |

Gender M = Male, F = Female; Dmis = Missense variants with 'D' annotation per MetaSVM; T-mis = Missense variants with 'T' or '.' annotation per MetaSVM; y = Yes; n = No
